# Supplementary material for: Development of a new patient-derived xenograft humanised mouse model to study human-specific tumour microenvironment and immunotherapy
Source: PubMed Central journal article supplement — Gut. 2018 Mar 30;67(10):1845–54. doi: 10.1136/gutjnl-2017-315201 (PMC6145285; doi:10.1136/gutjnl-2017-315201), 2018-03-30
Supplement: gutjnl-2017-315201supp001.pdf [file gutjnl-2017-315201supp001.pdf]

**Table S1. HLA typing results of HCCs and HSCs**

| Sample ID |        | HLA-A*   | HLA-A*   | HLA-B*  | HLA-B*  | HLA-DRB1*  | HLA-DRB1*  |
|-----------|--------|----------|----------|---------|---------|------------|------------|
| HCC       | HCC#1  | A*02:AH  | A*11:NMV | B*46:01 | B*51:01 | DRB1*03:01 | DRB1*12:02 |
|           | HCC#2  | A*01:01  | A*03:01  | B*51:01 | B*52:01 | DRB1*14:04 | DRB1*15:02 |
|           | HCC#3  | A*02:06  | A*33:03  | B*55:02 | B*58:01 | DRB1*03:01 | DRB1*12:02 |
|           | HCC#4  | A*02:01  | A*11:01  | B*51:01 | B*51:01 | DRB1*03:01 | DRB1*14:03 |
| HSC       | HSC#1  | A*02:07  | A*33:03  | B*46:01 | B*58:01 | DRB1*03:01 | DRB1*09:01 |
|           | HSC#2  | A*03:01  | A*24:02  | B*40:01 | B*52:01 | DRB1*14:04 | DRB1*15:02 |
|           | HSC#3  | A*01:01  | A*03:01  | B*51:01 | B*57:01 | DRB1*07:01 | DRB1*15:02 |
|           | HSC#4  | A*24:02  | A*33:03  | B*18:01 | B*58:01 | DRB1*03:01 | DRB1*12:02 |
|           | HSC#5  | A*11:01  | A*11:01  | B*35:01 | B*56:03 | DRB1*09:01 | DRB1*09:01 |
|           | HSC#6  | A*11:NMV | A*02:AH  | B*46:01 | B*51:01 | DRB1*12:02 | DRB1*07:01 |
|           | HSC#7  | A*24:02  | A*33:01  | B*14:02 | B*40:01 | DRB1*01:02 | DRB1*08:03 |
|           | HSC#8  | A*02:06  | A*02:03  | B*55:02 | B*58:02 | DRB1*03:02 | DRB1*14:04 |
|           | HSC#9  | A*11:01  | A*24:02  | B*52:01 | B*55:01 | DRB1*04:01 | DRB1*15:01 |
|           | HSC#10 | A*24:07  | A*24:07  | B*15:02 | B*40:01 | DRB1*04:03 | DRB1*14:04 |
|           | HSC#11 | A*02:01  | A*11:01  | B*35:01 | B*40:01 | DRB1*04:03 | DRB1*11:01 |
|           | HSC#12 | A*11:01  | A*33:03  | B*35:03 | B*15:02 | DRB1*07:01 | DRB1*13:02 |

**Table S2. Primer sequences for relative genes**

| Gene          | Forward primer          | Reverse primer          |
|---------------|-------------------------|-------------------------|
| <i>hGAPDH</i> | AGGGCTGCTTTTAACTCTGGT   | CCCCTTGATTTTGGAGGGA     |
| <i>hPDL1</i>  | TGGCATTGCTGAACGCATT     | TGCAGCCAGGTCTAATTGTTTT  |
| <i>hPDL2</i>  | ACCCTGGAATGCAACTTTGAC   | AAGTGGCTCTTTCACGGTGTG   |
| <i>hCD80</i>  | GGGCACATACGAGTGTGTTGT   | TCAGCTTTGACTGATAACGTCAC |
| <i>hCD86</i>  | CTGCTCATCTATACACGGTTACC | GGAAACGTCGTACAGTTCTGTG  |
| <i>hCD48</i>  | AGCTGCAAGTGCTTGACCC     | CAGACTCGCCAGGTATCACAC   |

|                    |                       |                       |
|--------------------|-----------------------|-----------------------|
| <i>hCD155</i>      | TGGAGGTGACGCATGTGTC   | GTTTGGACTCCGAATAGCTGG |
| <i>hCECAM-1</i>    | TGCTCTGATAGCAGTAGCCCT | TGCCGGTCTTCCCGAAATG   |
| <i>hHVEM</i>       | GTGCAGTCCAGGTTATCGTGT | CACTTGCTTAGGCCATTGAGG |
| <i>hGAL-9</i>      | GGACGGACTTCAGATCACTGT | CCATCTTCAAACCGAGGGTTG |
| <i>hE-CADHERIN</i> | CGAGAGCTACACGTTACGG   | GGGTGTCGAGGGAAAAATAGG |

---
